# Supplementary material
Source: Springer Nature journal article supplement (https://www.springermedizin.de/resource/supplementary/12933_2008_139_MOESM1_ESM.pdf/9539682)

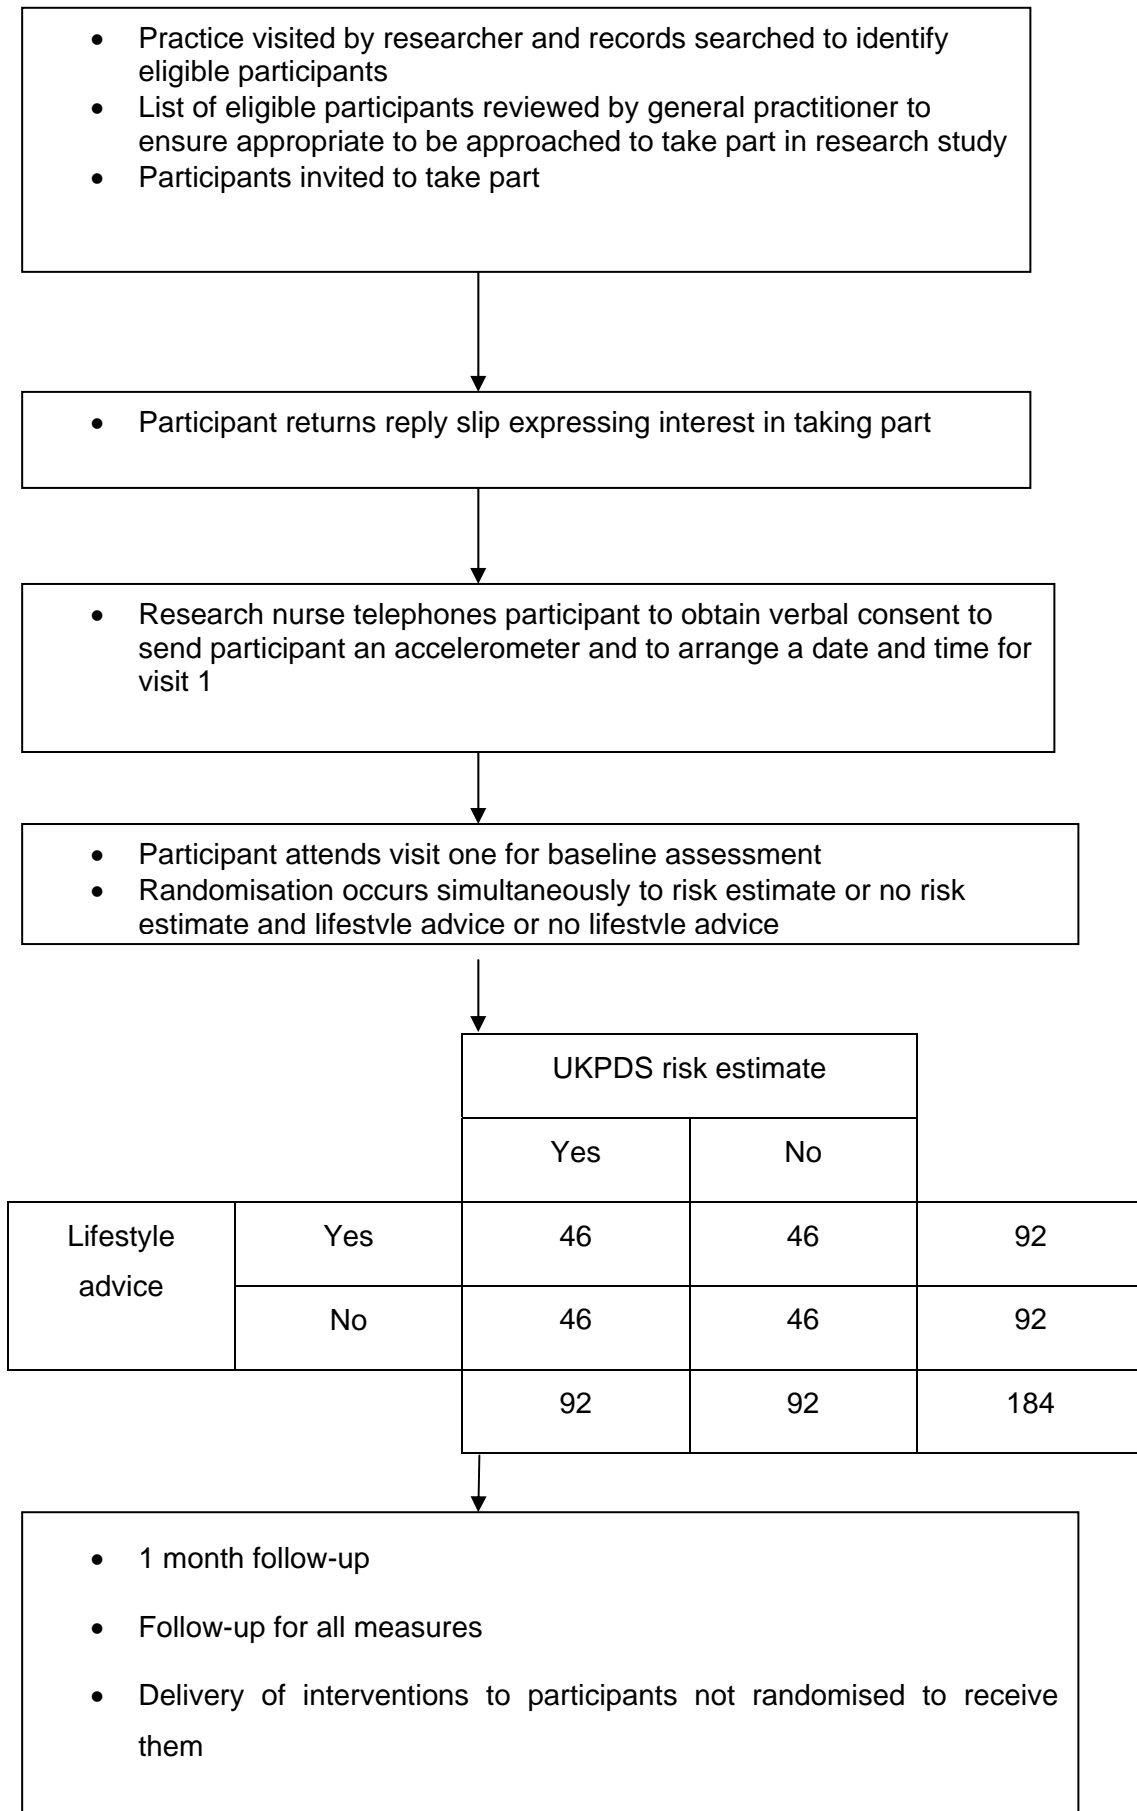

Figure 1: Study flow chart from recruitment to completion at 1 month

Supplement: MOESM1 [file 9539682]
